# Supplementary material
Source: PubMed Central journal article supplement (PMC1157048)

**A** Rest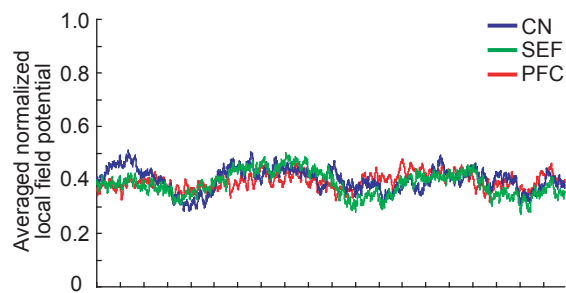**B** Four saccades, 600ms target intervals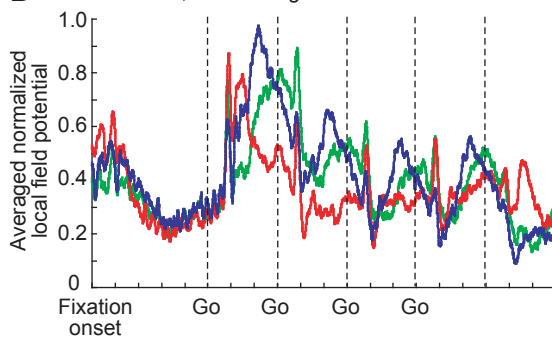**C** Four saccades, 800ms target intervals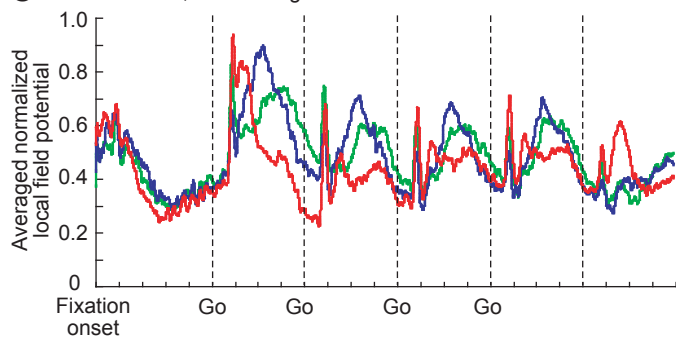**D** Single saccade, alignment to Go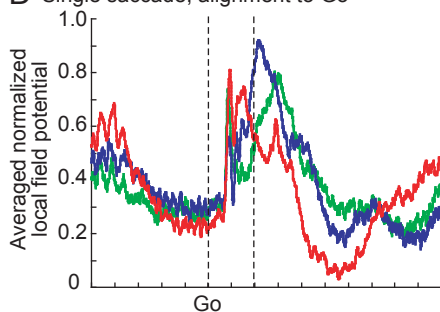**E** Last-target-yellow task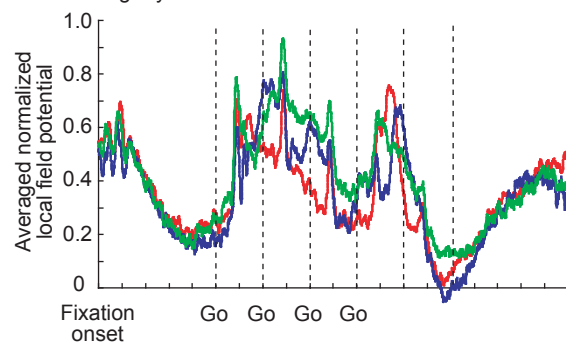**F** Fixation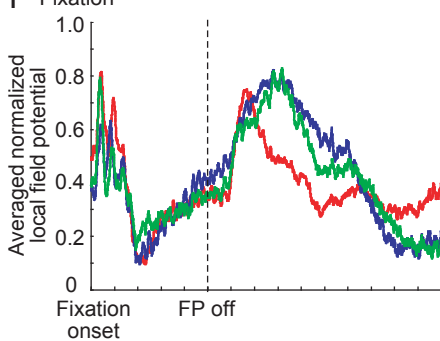**G** Reward and click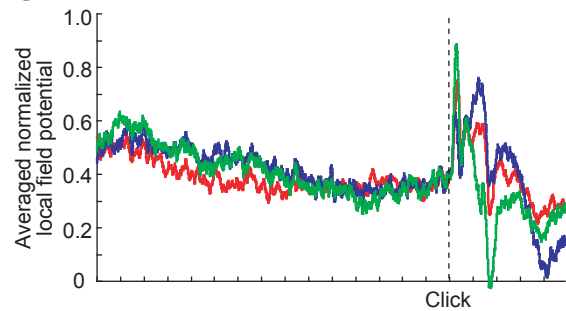**H** Click only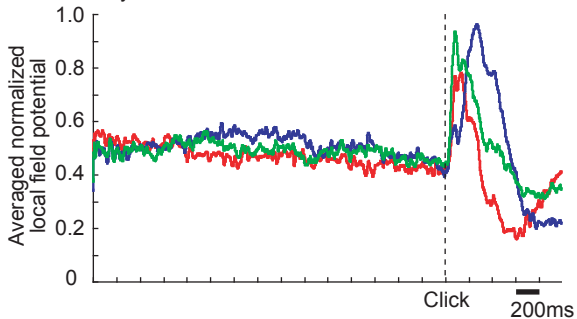

Supplement: pnas_0503541102_3.pdf [file pnas_0503541102_3.pdf]
